# Supplementary material
Source: publisher site journal article supplement (https://www.spandidos-publications.com/5179/downloadSupplementary)

Figure S1. HepG2 cells were transfected with siRNAs. The ATP1A1 mRNA and protein expression levels were significantly reduced at 48 h post-transfection compared with the NC group. (A) siRNA knockdown efficiency was assessed using reverse transcription-quantitative PCR. (B) The efficiency of ATP1A1 siRNA was assessed using western blotting. Data are presented as mean  $\pm$  SD, n=3. \*P<0.05 and \*\*\*P<0.001 vs. NC. NC, negative control; siRNA, short interfering RNA; ATP1A1, ATPase Na<sup>+</sup>/K<sup>+</sup> transporting subunit  $\alpha$ 1.

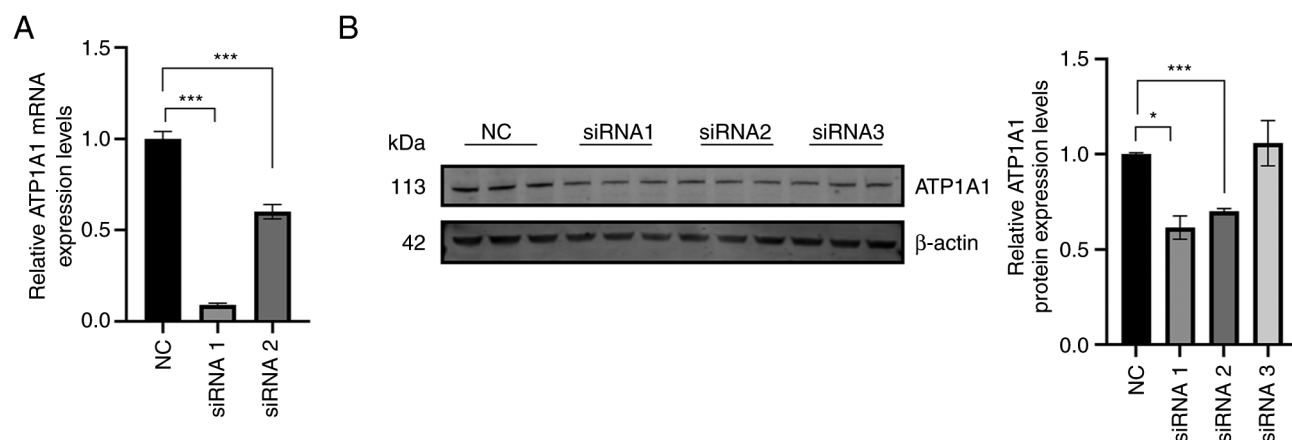

Supplement: Supplementary file 1 [file downloadSupplementary]
